# Supplementary material
Source: PubMed Central journal article supplement (PMC6781128)
Supplement: 41437_2019_235_MOESM7_ESM.pdf [file 41437_2019_235_MOESM7_ESM.pdf]

**Table S1: List of the candidate QDR loci identified using the local score analysis (ksi = 2, chromosome-wide FWER of 20%) from GWAS of QDR to five different *A. euteiches* isolates.**

| phenotype      | Aphanomyces_isolate | chromosome | beg_int  | end_int  | maximum_Lindley | SNPs_int | minimum_p-value | closest_gene_model(s)                           | gene_model(s)_position                                | gene_annotation                                                                                        | local_score_quantile_0.8 |
|----------------|---------------------|------------|----------|----------|-----------------|----------|-----------------|-------------------------------------------------|-------------------------------------------------------|--------------------------------------------------------------------------------------------------------|--------------------------|
| Root Rot Index | MF1                 | 1          | 10878511 | 10879559 | 22,18478        | 25       | 0,000224184     | Medtr1g031150                                   | 10878163-10881162                                     | nudix hydrolase-like protein                                                                           | 9,221932566              |
| Root Rot Index | ATCC 201684         | 1          | 14554714 | 14555748 | 14,45859        | 37       | 1,78E-05        | Medtr1g039380                                   | 14556668-14563651                                     | serine/threonine protein phosphatase 2A                                                                | 11,82315958              |
| PC1            | ATCC 201684         | 1          | 14554714 | 14555604 | 14,22802        | 29       | 3,54E-05        | Medtr1g039380                                   | 14556668-14563651                                     | serine/threonine protein phosphatase 2A                                                                | 13,97505369              |
| Root Rot Index | MF1                 | 1          | 15268016 | 15274081 | 25,48755        | 144      | 2,49E-05        | Medtr1g041135<br>Medtr1g041155                  | 15268312-15274191<br>15287020-15289220                | hypothetical protein<br>DUF506 family protein                                                          | 9,221932566              |
| Root Rot Index | RB84                | 1          | 17291546 | 17295225 | 16,81812        | 40       | 5,17E-06        | Medtr1g045930                                   | 17288890-17303141                                     | triacylglycerol lipase, putative                                                                       | 13,64821914              |
| Root Rot Index | ATCC 201684         | 1          | 24912754 | 24913589 | 12,80374        | 31       | 0,000151341     | Medtr1g056890                                   | 24911996-24915821                                     | DNA-directed RNA polymerase I, II                                                                      | 11,82315958              |
| Root Rot Index | ATCC 201684         | 1          | 25126456 | 25127994 | 13,9366         | 43       | 0,000109948     | Medtr1g057160                                   | 25122651-25123180                                     | transmembrane protein, putative                                                                        | 11,82315958              |
| PC1            | ATCC 201684         | 1          | 25126666 | 25127994 | 18,33914        | 36       | 3,76E-05        | Medtr1g057160                                   | 25122651-25123180                                     | transmembrane protein, putative                                                                        | 13,97505369              |
| Root Rot Index | RB84                | 2          | 7286918  | 7289512  | 25,77647        | 43       | 3,94E-05        | Medtr2g021400                                   | 7282174-7290385                                       | mediator of RNA polymerase II transcription subunit 33A                                                | 14,29983252              |
| Root Rot Index | NC1                 | 2          | 17087034 | 17087326 | 9,819844        | 11       | 0,000379457     | Medtr2g039010                                   | 17086581-17087721                                     | NBS-LRR type disease resistance protein                                                                | 9,267976009              |
| Root Rot Index | Ae109               | 2          | 17757970 | 17763738 | 27,5009         | 48       | 0,000109361     | Medtr2g040470                                   | 17749011-17761009                                     | plant/F27B13-30 protein                                                                                | 15,69930025              |
| Root Rot Index | ATCC 201684         | 2          | 28549842 | 28550386 | 14,64863        | 17       | 3,67E-05        | Medtr2g068760                                   | 28555522-28560775                                     | LOB domain protein                                                                                     | 12,58553576              |
| Root Rot Index | ATCC 201684         | 2          | 30363772 | 30365390 | 41,60256        | 68       | 7,07E-07        | Medtr2g072210<br>Medtr2g072240                  | 30355770-30361583<br>30371049-30374014                | transmembrane protein, putative<br>FBD, F-box and LRR protein                                          | 12,58553576              |
| Root Rot Index | RB84                | 2          | 30365092 | 30365390 | 16,0537         | 13       | 7,12E-06        | Medtr2g072210<br>Medtr2g072240                  | 30355780-30361636<br>30371049-30374014                | transmembrane protein, putative<br>FBD, F-box and LRR protein                                          | 14,29983252              |
| Root Rot Index | RB84                | 2          | 36813859 | 36814635 | 28,675          | 25       | 9,22E-06        | Medtr2g087520<br>Medtr2g087530                  | 36818481-36824372<br>36825444-36835604                | chaperone DnaJ domain protein<br>serine/threonine-protein phosphatase BSL2-like protein                | 14,29983252              |
| Root Rot Index | Ae109               | 2          | 36813934 | 36814635 | 15,71384        | 22       | 3,22E-05        | Medtr2g087520<br>Medtr2g087530                  | 36818481-36824372<br>36825444-36835604                | chaperone DnaJ domain protein<br>serine/threonine-protein phosphatase BSL2-like protein                | 15,69930025              |
| Root Rot Index | ATCC 201684         | 2          | 36813934 | 36814635 | 17,003          | 22       | 2,08E-05        | Medtr2g087520<br>Medtr2g087530                  | 36818481-36824372<br>36825444-36835604                | chaperone DnaJ domain protein<br>serine/threonine-protein phosphatase BSL2-like protein                | 12,58553576              |
| Root Rot Index | RB84                | 3          | 2819204  | 2819911  | 15,2738         | 32       | 1,40E-05        | Medtr3g011420                                   | 2817873-2821404                                       | NBS-LRR type disease resistance protein                                                                | 14,14513314              |
| PC1            | ATCC 201684         | 3          | 2819204  | 2819911  | 23,53528        | 32       | 2,95E-06        | Medtr3g011420                                   | 2817873-2821404                                       | NBS-LRR type disease resistance protein                                                                | 13,92118305              |
| Root Rot Index | ATCC 201684         | 3          | 2819240  | 2820250  | 19,63161        | 49       | 3,17E-05        | Medtr3g011420                                   | 2817873-2821404                                       | NBS-LRR type disease resistance protein                                                                | 12,17778442              |
| PC1            | ATCC 201684         | 3          | 2833877  | 2839136  | 101,10319       | 167      | 3,93E-07        | Medtr3g011460                                   | 2834874-2839356                                       | LRR and NB-ARC domain disease resistance protein                                                       | 13,92118305              |
| Root Rot Index | ATCC 201684         | 3          | 2835821  | 2838658  | 48,94302        | 109      | 3,90E-06        | Medtr3g011460                                   | 2834874-2839356                                       | LRR and NB-ARC domain disease resistance protein                                                       | 12,17778442              |
| Root Rot Index | RB84                | 3          | 2836882  | 2838194  | 21,35922        | 40       | 6,86E-06        | Medtr3g011460                                   | 2834874-2839356                                       | LRR and NB-ARC domain disease resistance protein                                                       | 14,14513314              |
| Root Rot Index | ATCC 201684         | 3          | 2855462  | 2855546  | 14,5176         | 13       | 8,95E-05        | Medtr3g011480                                   | 2852782-2856642                                       | LRR and NB-ARC domain disease resistance protein                                                       | 12,17778442              |
| PC1            | ATCC 201684         | 3          | 2855462  | 2855546  | 15,67875        | 13       | 3,58E-05        | Medtr3g011480                                   | 2852782-2856642                                       | LRR and NB-ARC domain disease resistance protein                                                       | 13,92118305              |
| Root Rot Index | RB84                | 3          | 2912666  | 2924125  | 463,04928       | 164      | 4,78E-17        | Medtr3g011610<br>Medtr3g011620<br>Medtr3g011630 | 2911993-2917319<br>2917554-2922861<br>2923472-2926629 | myb transcription factor<br>NB-ARC domain disease resistance protein<br>tyrosine kinase family protein | 14,14513314              |

|                       |                    |          |                 |                 |                   |            |                 |                      |                          |                                                                 |                    |
|-----------------------|--------------------|----------|-----------------|-----------------|-------------------|------------|-----------------|----------------------|--------------------------|-----------------------------------------------------------------|--------------------|
| <b>PC1</b>            | <b>ATCC 201684</b> | <b>3</b> | <b>2912666</b>  | <b>2924125</b>  | <b>1179,93284</b> | <b>164</b> | <b>5,25E-35</b> | <b>Medtr3g011610</b> | <b>2911993-2917319</b>   | <b>myb transcription factor</b>                                 | <b>13,92118305</b> |
|                       |                    |          |                 |                 |                   |            |                 | <b>Medtr3g011620</b> | <b>2917554-2922861</b>   | <b>NB-ARC domain disease resistance protein</b>                 |                    |
|                       |                    |          |                 |                 |                   |            |                 | <b>Medtr3g011630</b> | <b>2923472-2926629</b>   | <b>tyrosine kinase family protein</b>                           |                    |
| <b>Root Rot Index</b> | <b>ATCC 201684</b> | <b>3</b> | <b>2913290</b>  | <b>2924125</b>  | <b>600,96744</b>  | <b>160</b> | <b>5,83E-18</b> | <b>Medtr3g011610</b> | <b>2911993-2917319</b>   | <b>myb transcription factor</b>                                 | <b>12,17778442</b> |
|                       |                    |          |                 |                 |                   |            |                 | <b>Medtr3g011620</b> | <b>2917554-2922861</b>   | <b>NB-ARC domain disease resistance protein</b>                 |                    |
|                       |                    |          |                 |                 |                   |            |                 | <b>Medtr3g011630</b> | <b>2923472-2926629</b>   | <b>tyrosine kinase family protein</b>                           |                    |
| PC1                   | ATCC 201684        | 3        | 3036962         | 3037802         | 14,14819          | 27         | 5,10E-05        | Medtr3g011840        | 3027773-3044636          | multidrug resistance protein ABC transporter family protein     | 13,92118305        |
| Root Rot Index        | RB84               | 3        | 3235322         | 3236858         | 17,57822          | 45         | 0,000106124     | Medtr3g012080        | 3214097-3216757          | disease resistance protein (CC-NBS-LRR class) family protein    | 14,14513314        |
|                       |                    |          |                 |                 |                   |            |                 | Medtr3g012090        | 3218807-3222313          | protein                                                         |                    |
| Root Rot Index        | ATCC 201684        | 3        | 13484913        | 13485684        | 17,77861          | 20         | 4,10E-06        | Medtr3g036290        | 13478759-13479838        | NBS-LRR type disease resistance protein                         | 12,17778442        |
|                       |                    |          |                 |                 |                   |            |                 | Medtr3g036310        | 13484893-13485833        | F-box protein interaction domain protein                        |                    |
|                       |                    |          |                 |                 |                   |            |                 |                      |                          | hypothetical protein                                            |                    |
| <b>PC1</b>            | <b>ATCC 201684</b> | <b>3</b> | <b>14799474</b> | <b>14830831</b> | <b>38,47211</b>   | <b>202</b> | <b>1,52E-06</b> | <b>Medtr3g045530</b> | <b>14812943-14814931</b> | <b>hypothetical protein</b>                                     | <b>13,92118305</b> |
|                       |                    |          |                 |                 |                   |            |                 | <b>Medtr3g041760</b> | <b>14820578-14820826</b> | <b>hypothetical protein</b>                                     |                    |
|                       |                    |          |                 |                 |                   |            |                 | <b>Medtr3g041730</b> | <b>14832295-14834177</b> | <b>DEAD-box helicase family protein</b>                         |                    |
|                       |                    |          |                 |                 |                   |            |                 | <b>Medtr3g041720</b> | <b>14836286-14837577</b> | <b>molybdopterin biosynthesis protein MoaE</b>                  |                    |
| <b>Root Rot Index</b> | <b>RB84</b>        | <b>3</b> | <b>14829650</b> | <b>14830059</b> | <b>25,46016</b>   | <b>28</b>  | <b>5,00E-06</b> | <b>Medtr3g041730</b> | <b>14832295-14834177</b> | <b>DEAD-box helicase family protein</b>                         | <b>14,14513314</b> |
|                       |                    |          |                 |                 |                   |            |                 | <b>Medtr3g041720</b> | <b>14836286-14837577</b> | <b>molybdopterin biosynthesis protein MoaE</b>                  |                    |
| Root Rot Index        | MF1                | 3        | 16011317        | 16019229        | 17,72545          | 46         | 2,57E-05        | Medtr3g047980        | 16010859-16011971        | F-box SKIP23-like protein, putative                             | 9,489304074        |
|                       |                    |          |                 |                 |                   |            |                 | Medtr3g048000        | 16023789-16026007        | serpin-like protein                                             |                    |
| <b>Root Rot Index</b> | <b>MF1</b>         | <b>3</b> | <b>16256496</b> | <b>16257466</b> | <b>11,63113</b>   | <b>26</b>  | <b>1,32E-06</b> | <b>Medtr3g089500</b> | <b>16265962-16266185</b> | <b>transmembrane protein, putative</b>                          | <b>9,489304074</b> |
|                       |                    |          |                 |                 |                   |            |                 | <b>Medtr3g089510</b> | <b>16268615-16275519</b> | <b>MAP kinase-like protein</b>                                  |                    |
| <b>Root Rot Index</b> | <b>NC1</b>         | <b>3</b> | <b>16350319</b> | <b>16350416</b> | <b>22,478036</b>  | <b>18</b>  | <b>2,51E-05</b> | <b>Medtr3g448620</b> | <b>16349669-16351514</b> | <b>pentatricopeptide (PPR) repeat protein</b>                   | <b>9,853467472</b> |
| Root Rot Index        | NC1                | 3        | 20174390        | 20174707        | 15,965279         | 11         | 8,95E-06        | Medtr3g051120        | 20169884-20174798        | tryptophan synthase beta type 2                                 | 9,853467472        |
| Root Rot Index        | MF1                | 3        | 23313527        | 23313861        | 10,52367          | 17         | 0,0010368       | Medtr3g058610        | 23307135-23311370        | naringenin 3-dioxygenase (flavanone-3-hydroxylase)              | 9,489304074        |
|                       |                    |          |                 |                 |                   |            |                 | Medtr3g058620        | 23311920-23316111        | 50S ribosomal protein L19-2                                     |                    |
| Root Rot Index        | MF1                | 3        | 25713638        | 25714823        | 28,57215          | 50         | 6,56E-05        | Medtr3g464020        | 25713879-25714306        | hypothetical protein                                            | 9,489304074        |
|                       |                    |          |                 |                 |                   |            |                 | Medtr3g464030        | 25719727-25724275        | disease resistance protein (TIR-NBS-LRR class)                  |                    |
| Root Rot Index        | ATCC 201684        | 3        | 39735220        | 39736211        | 24,056            | 43         | 0,000134894     | Medtr3g087700        | 39733238-39734754        | DUF581 family protein                                           | 12,17778442        |
| Root Rot Index        | ATCC 201684        | 3        | 43582596        | 43584452        | 23,64819          | 42         | 3,17E-05        | Medtr3g095380        | 43576349-43579439        | transcription elongation factor (TFIIS) family protein          | 12,17778442        |
|                       |                    |          |                 |                 |                   |            |                 | Medtr3g095390        | 43587855-43588527        | transmembrane protein, putative                                 |                    |
| Root Rot Index        | ATCC 201684        | 4        | 4366146         | 4366318         | 12,24964          | 14         | 8,59E-05        | Medtr4g015060        | 4356331-4364912          | disease resistance protein (TIR-NBS-LRR class)                  | 12,1038147         |
| Root Rot Index        | RB84               | 4        | 6592109         | 6596295         | 66,63734          | 133        | 2,42E-09        | Medtr4g020590        | 6586360-6594472          | disease resistance protein (TIR-NBS-LRR class), putative        | 13,79874408        |
| Root Rot Index        | NC1                | 4        | 8418674         | 8418794         | 13,379621         | 9          | 8,46E-07        | Medtr4g024830        | 8415912-8417670          | F-box/RNI/FBD-like domain protein                               | 9,202556916        |
|                       |                    |          |                 |                 |                   |            |                 | Medtr4g024850        | 8419903-8424452          | DNA repair and recombination protein RadA                       |                    |
| Root Rot Index        | MF1                | 4        | 12764922        | 12766006        | 11,5275           | 18         | 7,07E-05        | Medtr4g035955        | 12762546-12767438        | glycosyl hydrolase family 9 protein                             | 9,79882802         |
| <b>Root Rot Index</b> | <b>MF1</b>         | <b>4</b> | <b>24983236</b> | <b>24983947</b> | <b>16,76364</b>   | <b>24</b>  | <b>1,61E-05</b> | <b>Medtr4g066210</b> | <b>24984112-24988288</b> | <b>cyanogenic beta-glucosidase, putative</b>                    | <b>9,79882802</b>  |
| <b>Root Rot Index</b> | <b>Ae109</b>       | <b>4</b> | <b>25098185</b> | <b>25099496</b> | <b>17,43247</b>   | <b>4</b>   | <b>4,52E-06</b> | <b>Medtr4g066380</b> | <b>25062108-25065460</b> | <b>basic helix loop helix (bHLH) DNA-binding family protein</b> | <b>15,76593599</b> |
|                       |                    |          |                 |                 |                   |            |                 | <b>Medtr4g066460</b> | <b>25111953-25114108</b> | <b>basic helix loop helix (bHLH) DNA-binding family protein</b> |                    |
| Root Rot Index        | Ae109              | 4        | 42323830        | 42325077        | 15,94455          | 11         | 8,39E-06        | Medtr4g102230        | 42319525-42325193        | immature colon carcinoma transcript 1 protein                   | 15,76593599        |
|                       |                    |          |                 |                 |                   |            |                 | Medtr4g102220        | 42326288-42327158        | DUF1442 family protein                                          |                    |
| Root Rot Index        | NC1                | 4        | 49713238        | 49713441        | 19,662803         | 11         | 1,00E-06        | Medtr4g119930        | 49700820-49704236        | cullin-like protein                                             | 9,202556916        |
|                       |                    |          |                 |                 |                   |            |                 | Medtr4g119960        | 49717329-49723519        | BTB/POZ domain protein                                          |                    |
| Root Rot Index        | RB84               | 5        | 5045294         | 5047542         | 17,87015          | 27         | 9,14E-06        | Medtr5g014850        | 5045676-5047471          | cytochrome P450 family protein                                  | 15,19397128        |
|                       |                    |          |                 |                 |                   |            |                 | Medtr5g014860        | 5052966-5054490          | Clavata3/ESR (CLE) gene family member MtCLE04                   |                    |

|                       |                    |          |                 |                 |                 |           |                    |                                                 |                                                             |                                                                                                                |                    |
|-----------------------|--------------------|----------|-----------------|-----------------|-----------------|-----------|--------------------|-------------------------------------------------|-------------------------------------------------------------|----------------------------------------------------------------------------------------------------------------|--------------------|
| Root Rot Index        | RB84               | 5        | 6943599         | 6944735         | 18,06522        | 23        | 2,10E-05           | Medtr5g018570<br>Medtr5g018580<br>Medtr5g018600 | 6931244-6936289<br>6936600-6939549<br>6944048-6947851       | wall associated kinase-like protein<br>thioredoxin-like protein<br>TPR domain protein                          | 15,19397128        |
| PC1                   | ATCC 201684        | 5        | 7272508         | 7273746         | 16,59735        | 22        | 3,38E-09           | Medtr5g019220<br>Medtr5g019300                  | 7265809-7267481<br>7291465-7292943                          | CAZy family GT8 glycosyltransferase<br>zinc finger, C3HC4 type (RING finger) protein                           | 14,53974623        |
| PC1                   | ATCC 201684        | 5        | 7347441         | 7349282         | 21,18521        | 45        | 1,60E-06           | Medtr5g019480<br>Medtr5g019490                  | 7350958-7354820<br>7356021-7360381                          | ubiquitin-conjugating enzyme<br>MFS transporter                                                                | 14,53974623        |
| PC1                   | ATCC 201684        | 5        | 7446807         | 7447516         | 14,54324        | 9         | 1,83E-07           | Medtr5g019650                                   | 7445674-7447386                                             | homeobox leucine zipper protein                                                                                | 14,53974623        |
| PC1                   | ATCC 201684        | 5        | 16280245        | 16281578        | 19,74503        | 31        | 7,92E-06           | Medtr5g037260<br>Medtr5g037270                  | 16273998-16280229<br>16296142-16300981                      | transmembrane protein, putative<br>plant/F14N23-31 protein                                                     | 14,53974623        |
| Root Rot Index        | RB84               | 5        | 16411866        | 16412110        | 22,2787         | 11        | 4,02E-06           | Medtr5g037490<br>Medtr5g037500                  | 16409929-16410237<br>16412122-16415833                      | blight resistance protein, putative<br>NB-ARC domain disease resistance protein                                | 15,19397128        |
| Root Rot Index        | NC1                | 5        | 19787152        | 19787660        | 10,371545       | 14        | 0,000258803        | Medtr5g045130<br>Medtr5g045135                  | 19784322-19786700<br>19787647-19788118                      | plant/T31B5-30 protein<br>zinc ion-binding protein, putative                                                   | 9,146080217        |
| Root Rot Index        | NC1                | 5        | 34260380        | 34260854        | 17,849599       | 25        | 0,0001047          | Medtr5g080040<br>Medtr5g080050                  | 34260315-34260533<br>34262486-34264057                      | hypothetical protein<br>organic cation/carnitine transporter                                                   | 9,146080217        |
| Root Rot Index        | NC1                | 5        | 36910084        | 36910744        | 15,483275       | 41        | 0,000438758        | Medtr5g085380                                   | 36908086-36913115                                           | vacuolar protein sorting-associated protein                                                                    | 9,146080217        |
| Root Rot Index        | NC1                | 5        | 40263267        | 40264975        | 43,008716       | 48        | 4,20E-05           | Medtr5g092190                                   | 40256638-40265309                                           | disease resistance protein (TIR-NBS-LRR class)                                                                 | 9,146080217        |
| Root Rot Index        | MF1                | 6        | 3001668         | 3001723         | 10,31715        | 8         | 2,41E-05           | Medtr6g011060<br>Medtr6g011050                  | 2996587-2998229<br>3002811-3004508                          | DUF247 domain protein<br>DUF247 domain protein                                                                 | 9,383866389        |
| <b>Root Rot Index</b> | <b>ATCC 201684</b> | <b>6</b> | <b>6410276</b>  | <b>6411329</b>  | <b>17,98182</b> | <b>30</b> | <b>8,57E-05</b>    | <b>Medtr6g016720</b>                            | <b>6409485-6411057</b>                                      | <b>RNI superfamily protein, putative</b>                                                                       | <b>12,10880618</b> |
| <b>Root Rot Index</b> | <b>RB84</b>        | <b>6</b> | <b>6410276</b>  | <b>6411264</b>  | <b>19,07363</b> | <b>29</b> | <b>0,000100013</b> | <b>Medtr6g016720</b>                            | <b>6409485-6411057</b>                                      | <b>RNI superfamily protein, putative</b>                                                                       | <b>15,05851623</b> |
| PC1                   | ATCC 201684        | 6        | 7568015         | 7569115         | 14,45387        | 20        | 4,76E-06           | Medtr5g019940<br>Medtr5g019950                  | 7562647-7565982<br>7568245-7572174                          | proline extensin-like receptor kinase, putative<br>sulfite exporter TauE/SafE family protein                   | 13,737706          |
| PC1                   | ATCC 201684        | 7        | 12860085        | 12861362        | 15,03289        | 22        | 1,92E-05           | Medtr7g034380                                   | 12859987-12862394                                           | subtilisin-like serine protease                                                                                | 13,83206897        |
| Root Rot Index        | Ae109              | 7        | 16885827        | 16886996        | 17,31878        | 43        | 5,95E-06           | Medtr7g050590<br>Medtr7g050640                  | 16873037-16874565<br>16888705-16889309                      | transcriptional factor B3 family protein<br>B3 DNA-binding domain protein                                      | 16,75382638        |
| PC1                   | ATCC 201684        | 7        | 26986478        | 26987111        | 19,0822         | 22        | 0,000210513        | Medtr7g072550<br>Medtr7g072560<br>Medtr7g072575 | 26985106-26988340<br>26990065-26995299<br>27004942-27008240 | WEB family plant protein<br>saposin B domain protein<br>CBL-interacting kinase                                 | 13,83206897        |
| PC1                   | ATCC 201684        | 8        | 4439777         | 4441811         | 40,119          | 32        | 3,01E-06           | Medtr8g014260                                   | 4439386-4442597                                             | F-box/RNI/FBD-like domain protein                                                                              | 13,78773838        |
| Root Rot Index        | ATCC 201684        | 8        | 6294736         | 6296369         | 16,98636        | 36        | 4,79E-05           | Medtr8g018450<br>Medtr8g018470                  | 6287218-6291683<br>6297035-6301008                          | seed linoleate 9S-lipoxygenase<br>hypothetical protein                                                         | 13,02758454        |
| <b>Root Rot Index</b> | <b>RB84</b>        | <b>8</b> | <b>19152643</b> | <b>19157601</b> | <b>23,21853</b> | <b>72</b> | <b>2,37E-05</b>    | <b>Medtr8g051540</b><br><b>Medtr8g051580</b>    | <b>19148365-19151700</b><br><b>19162447-19162992</b>        | <b>cysteine-rich RLK (receptor-like kinase) protein</b><br><b>MADS-box transcription factor family protein</b> | <b>15,67275528</b> |
| <b>PC1</b>            | <b>ATCC 201684</b> | <b>8</b> | <b>19156776</b> | <b>19157689</b> | <b>18,17782</b> | <b>54</b> | <b>0,000111332</b> | <b>Medtr8g051540</b><br><b>Medtr8g051580</b>    | <b>19148365-19151700</b><br><b>19162447-19162992</b>        | <b>cysteine-rich RLK (receptor-like kinase) protein</b><br><b>MADS-box transcription factor family protein</b> | <b>13,78773838</b> |
| <b>Root Rot Index</b> | <b>ATCC 201684</b> | <b>8</b> | <b>19156776</b> | <b>19157601</b> | <b>15,93477</b> | <b>49</b> | <b>0,000137802</b> | <b>Medtr8g051540</b><br><b>Medtr8g051580</b>    | <b>19148365-19151700</b><br><b>19162447-19162992</b>        | <b>cysteine-rich RLK (receptor-like kinase) protein</b><br><b>MADS-box transcription factor family protein</b> | <b>13,02758454</b> |
| Root Rot Index        | MF1                | 8        | 30590512        | 30595353        | 24,80352        | 66        | 2,26E-05           | Medtr8g072360                                   | 30587928-30595373                                           | GDA1/CD39 nucleoside phosphatase family protein                                                                | 10,03905383        |
